# Supplementary material for: New CuxSy/nanoporous carbon composites as efficient oxygen reduction catalysts in alkaline medium
Source: Royal Society of Chemistry journal article supplement (doi:10.1039/c4ta05342g), 2014-01-01
Supplement: c4ta05342g1.pdf [file c4ta05342g1.pdf]

# **New $\text{Cu}_x\text{S}_y/\text{S}$ -doped nanoporous carbon composites as efficient oxygen reduction catalysts in alkaline medium**

**Mykola Seredych,<sup>1</sup> Enrique Rodriguez-Castellon,<sup>2</sup> and Teresa J. Bandosz<sup>1\*</sup>**

*<sup>1</sup>Department of Chemistry, The City College of New York, 160 Convent Ave, New York, NY, 10031, USA.*

*<sup>2</sup>Departamento de Química Inorgánica, Facultad de Ciencias, Universidad de Málaga, Spain.*

\*Whom Correspondence should be addressed to. E-mail: [tbandosz@ccny.cuny.edu](mailto:tbandosz@ccny.cuny.edu); Tel: (212) 650-6017; Fax : (212) 650-6107

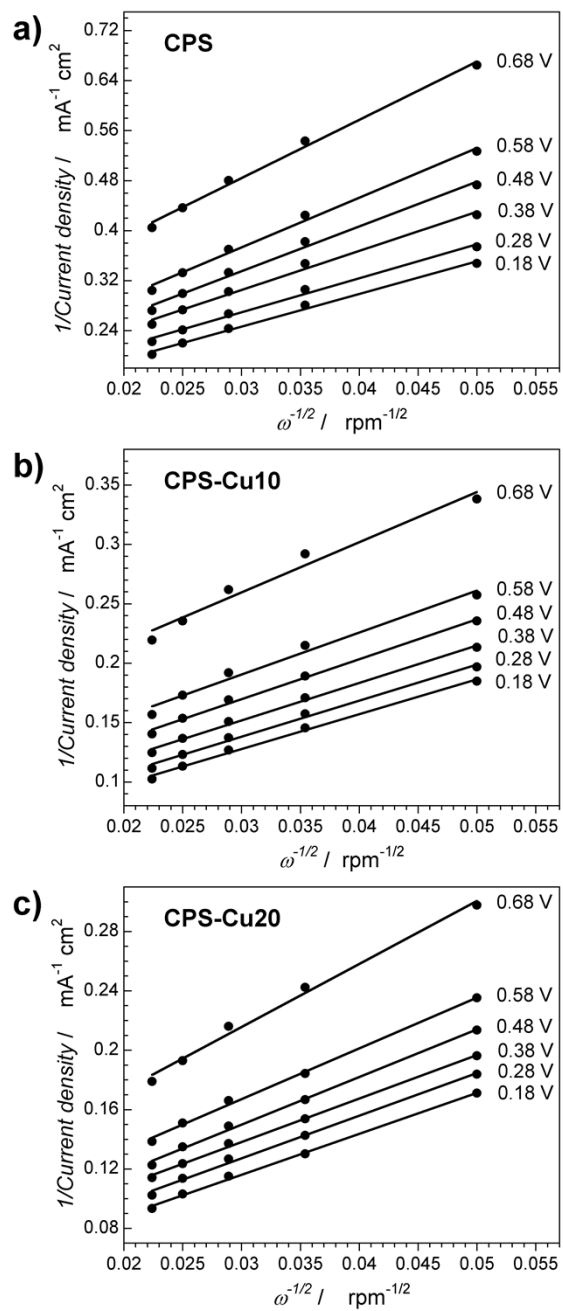

**Fig. S1.** Koutecky–Levich (K-L) plots for the (a) polymer-derived carbon, (b and c) copper/carbon composites at different potential values.

Nature of the ORR process on a Pt surface is complicated and not well understood. Under common ORR conditions, O<sub>2</sub> may be converted into different intermediates, such as oxygenated (O\*), hydroxyl (OH\*) and superhydroxyl (OOH\*) species. That might be a reason in the different current density and number of electron transfer.<sup>[1,2]</sup>

**Table S1.** Summary of performance of commercial Pt/C catalyst in 0.1 M KOH at 1600 rpm:

| Authors                     | Catalyst               | Kinetic current density<br>(mA cm <sup>-2</sup> ) | Scan rate<br>(mV s <sup>-1</sup> ) | Number of<br>electron<br>transfer,<br>average |
|-----------------------------|------------------------|---------------------------------------------------|------------------------------------|-----------------------------------------------|
| Balan <sup>[3]</sup>        | Pt/C                   | 4.1                                               | 5                                  | NA                                            |
| Palaniselvam <sup>[4]</sup> | 20 wt% Pt/C (E-TEK)    | 5.2                                               | 5                                  | NA                                            |
| Wu <sup>[5]</sup>           | 20 wt% Pt Vulcan XC-72 | ~6.0                                              | 10                                 | 3.9                                           |
| Zheng <sup>[6]</sup>        | Pt/C                   | ~4.0                                              | 5                                  | 3.8                                           |
| Zhang <sup>[7]</sup>        | 20 wt% Pt/carbon black | 4.0                                               | 10                                 | NA                                            |
| Lee <sup>[8]</sup>          | 20 wt% Pt Vulcan XC-72 | 4.5                                               | 10                                 | ~3.7                                          |
| An <sup>[9]</sup>           | 20 wt% Pt/C            | ~5.2                                              | 10                                 | 4.0                                           |
| Jiang <sup>[10]</sup>       | 20 wt% Pt/C            | 4.6                                               | 10                                 | ~3.7                                          |
| Zhang <sup>[11]</sup>       | 20 wt% Pt/C            | ~5.0                                              | 10                                 | NA                                            |
| Liang <sup>[12]</sup>       | 20 wt% Pt Vulcan XC-72 | ~10.5                                             | 100                                | 4.0                                           |
| Our work                    | 20 wt% Pt Vulcan XC-72 | 4.7                                               | 5                                  | 3.6                                           |

NA- not available

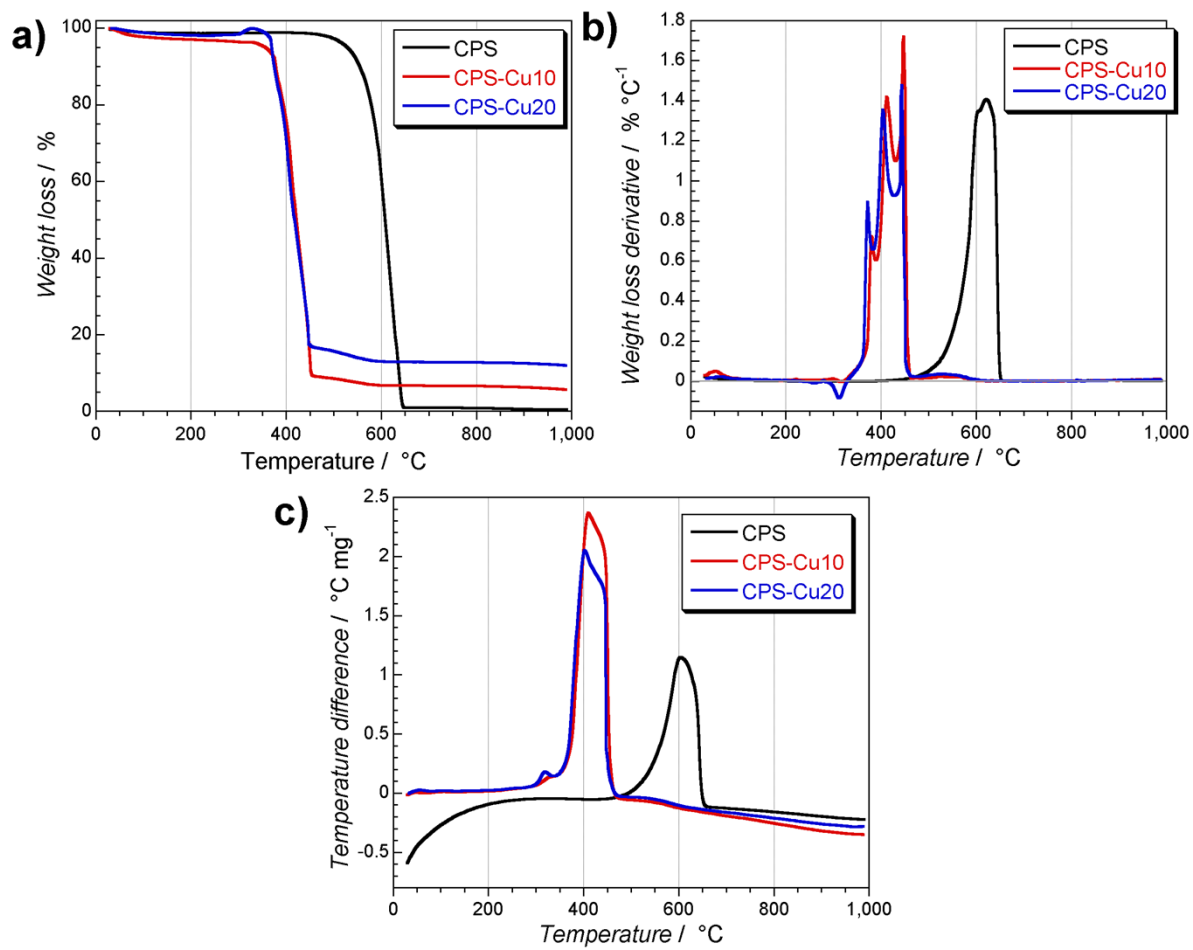

**Fig. S2.** a) Thermal Gravimetry (TG) curves; b) Differential Thermal Gravimetry (DTG) curves and c) Differential Thermal Analysis (DTA) curves in air for the materials studied.

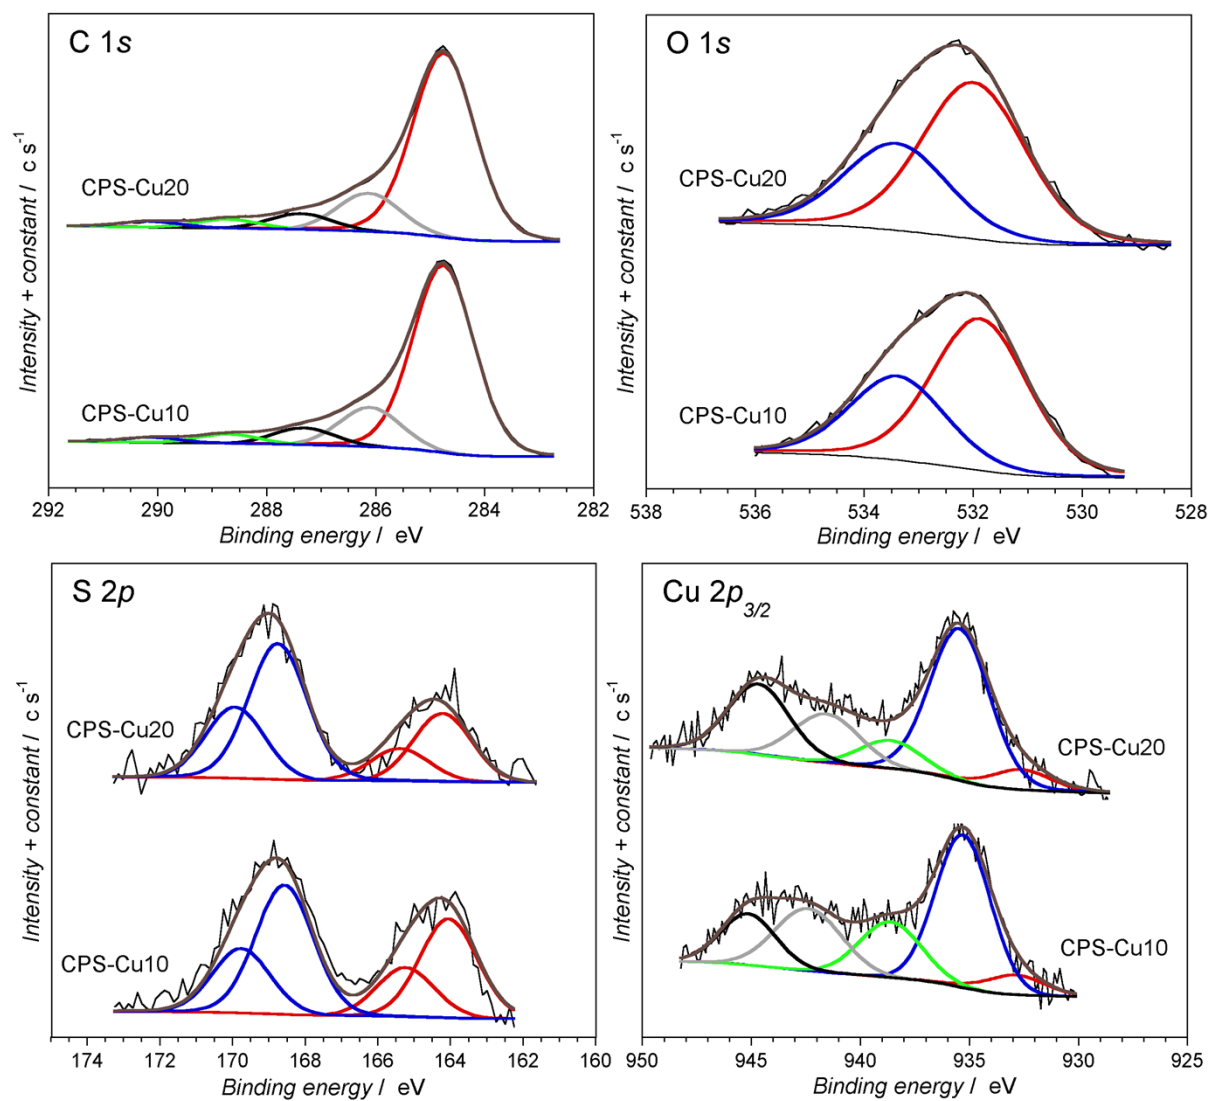

**Fig. S3.** C 1s, O 1s, S 2p and Cu 2p<sub>3/2</sub> core level peaks of XPS spectra for the carbon/graphene/copper composites.

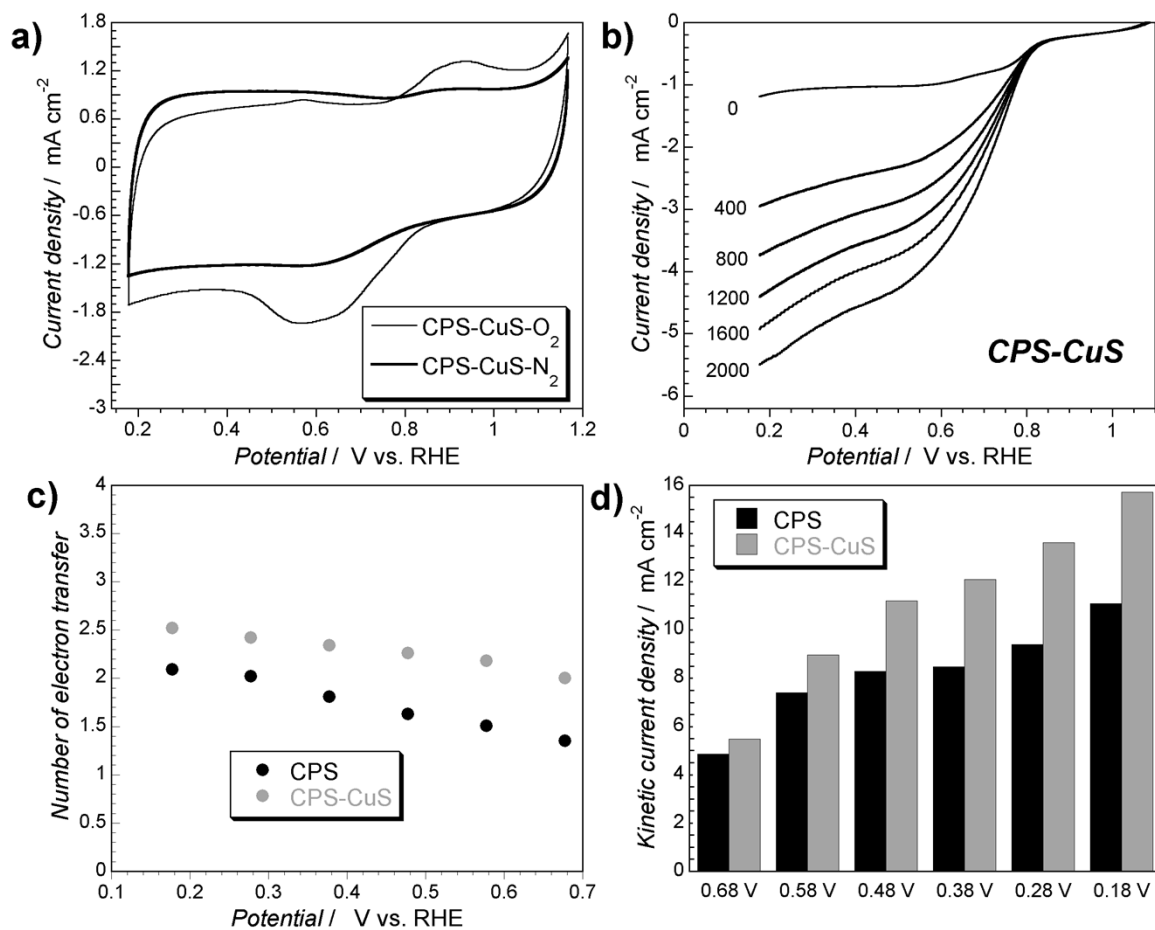

**Fig. S4.** (a) Cyclic voltammograms; (b) Linear sweep voltammograms on modified glassy carbon RDE in air-saturated 0.1 M KOH at scan rate of 5 mV s<sup>-1</sup> for the physical mixture of polymer-derived carbon (CPS) with a 2 wt. % of CuS; (c) number of electron transfer versus potential and (d) comparison of the kinetic current density.

## References

1. J. K. Nørskov, J. Rossmeisl, A. Logadottir, L. Lindqvist, J. R. Kitchin, T. Bligaard and H. Jonsson, *J. Phys. Chem. B* 2004, **108**, 17886-17892.
2. S. Guo, S. Zhang and S. Sun, *Angew. Chem.*, 2013, **125**, 8686-8705; *Angew. Chem. Int. Ed.*, 2013, **52**, 8526-8544.
3. B. K. Balan, A. P. Manissery, H. D. Chaudhari, U. K. Kharul and S. Kurungot, *J. Mater. Chem.*, 2012, **22**, 23668-23679.
4. T. Palaniselvam, H. B. Aiyappa and S. Kurungot, *J. Mater. Chem.*, 2012, **22**, 23799-23805.
5. J. Wu, Z. Yang, X. Li, Q. Sun, C. Jin, P. Strasser and R. Yang, *J. Mater. Chem. A*, 2013, **1**, 9889-9896.
6. Y. Zheng, Y. Jiao, J. Chen, J. Liu, J. Liang, A. Du, W. Zhang, Z. Zhu, S. C. Smith, M. Jaroniec, G.Q.M. Lu and S. Z. Qiao, *J. Am. Chem. Soc.*, 2011, **133**, 20116-20119.
7. C. Zhang, R. Hao, H. Lian and Y. Hou, *Nano Energy*, 2013, **2**, 88-97.
8. J.-S. Lee, K. Jo, T. Lee, T. Yun, J. Cho and B.-S. Kim, *J. Mater. Chem. A*, 2013, **1**, 9603-9607.
9. L. An, W. Huang, N. Zhang, X. Chen and D. Xia, *J. Mater. Chem. A*, 2014, **2**, 62-65.
10. S. Jiang, C. Zhu and S. Dong, *J. Mater. Chem. A*, 2013, **1**, 3593-3599.
11. Y. Zhang, M. Chu, L. Yang, W. Deng, Y. Tan, M. Ma and Q. Xie, *Chem. Commun.*, 2014, **50**, 6382-6385.
12. J. Liang, Y. Jiao, M. Jaroniec and S.Z. Qiao, *Angew. Chem.*, 2012, **124**, 11664-11668; *Angew. Chem. Int. Ed.*, 2012, **51**, 1-6.
